# Supplementary material for: Optimal duration of DAPT after second-generation drug-eluting stent in acute coronary syndrome
Source: PubMed Central journal article supplement (PMC6261023; doi:10.1371/journal.pone.0207386), 2018-11-26
Supplement: pone.0207386.s002.pdf [file pone.0207386.s002.pdf]

**Supplement Table 1. Clinical Outcomes During the First 12 Months in Acute Myocardial Infarction.**

|                          | <b>Short<br/>DAPT<br/>(n=304)</b> | <b>Standard<br/>DAPT<br/>(n=306)</b> | <b>HR (95% CI) *</b> | <b>P-value</b> |
|--------------------------|-----------------------------------|--------------------------------------|----------------------|----------------|
| Primary endpoint †       | 8 (2.6)                           | 8 (2.6)                              | 1.01 (0.38-2.69)     | 0.98           |
| <6 months                | 6 (1.9)                           | 6 (1.9)                              | 1.01 (0.33-3.14)     | 0.98           |
| ≥6 months                | 2 (0.7)                           | 2 (0.7)                              | 1.01 (0.14-7.19)     | 0.99           |
| Cardiac death, MI, or ST | 6 (2.0)                           | 7 (2.3)                              | 0.87 (0.29-2.58)     | 0.80           |
| <6 months                | 5 (1.6)                           | 5 (1.6)                              | 1.01 (0.29-3.49)     | 0.98           |
| ≥6 months                | 1 (0.4)                           | 2 (0.7)                              | 0.51 (0.05-5.59)     | 0.58           |
| All-cause death          | 4 (1.3)                           | 4 (1.3)                              | 1.01 (0.25-4.06)     | 0.98           |
| Cardiac death            | 2 (0.7)                           | 4 (1.3)                              | 0.50 (0.09-2.75)     | 0.43           |
| MI                       | 1 (0.3)                           | 3 (1.0)                              | 0.34 (0.04-3.23)     | 0.34           |
| ST                       | 4 (1.3)                           | 2 (0.7)                              | 2.03 (0.37-11.1)     | 0.41           |
| TVR                      | 15 (4.9)                          | 11 (3.6)                             | 1.39 (0.64-3.02)     | 0.41           |
| Stroke                   | 1 (0.3)                           | 1 (0.3)                              | 1.01 (0.07-16.1)     | 0.99           |
| Minor or major bleeding  | 3 (1.0)                           | 3 (1.0)                              | 1.01 (0.20-5.01)     | 0.99           |
| Major Bleeding ‡         | 1 (0.3)                           | 0 (0.0)                              |                      | 0.61           |

Data are number (%). \* HRs are for short-duration DAPT vs. standard-duration DAPT groups

† Primary endpoint was composite of Cardiac death, MI, ST, stroke or major bleeding.

‡ Major bleeding according to Thrombolysis in Myocardial Infarction criteria.<sup>15</sup>
