# Supplementary material for: Optimal duration of DAPT after second-generation drug-eluting stent in acute coronary syndrome
Source: PubMed Central journal article supplement (PMC6261023; doi:10.1371/journal.pone.0207386), 2018-11-26
Supplement: pone.0207386.s003.pdf [file pone.0207386.s003.pdf]

**Supplement Table 2. Clinical Outcomes During the First 12 Months according to PRECISE DAPT score groups.**

|                                                           | Short DAPT | Standard DAPT | p    | HR (95%CI) *     | p <sup>†</sup> |
|-----------------------------------------------------------|------------|---------------|------|------------------|----------------|
| <b>Not available PRECISE-DAPT</b>                         | 18         | 17            |      |                  |                |
| <b>Very low risk (<math>\leq 10</math>) group (n=720)</b> | 343        | 377           |      |                  |                |
| MI, ST, or Stroke                                         | 5(1.5)     | 1(0.3)        | 0.08 | 5.45(0.64-46.7)  | 0.12           |
| MI, ST, Stroke or TVR                                     | 22 (6.4)   | 10 (2.7)      | 0.01 | 2.47(1.17-5.22)  | 0.02           |
| Minor or Major bleeding                                   | 0          | 2 (0.5)       | 0.18 | NA               |                |
| Cardiac death, MI, ST, stroke or Major bleeding           | 6 (1.7)    | 1 (0.3)       | 0.04 | 6.54 (0.79-54.3) | 0.08           |
| Cardiac death, MI, ST, stroke, Major bleeding or TVR      | 23 (6.7)   | 10 (2.7)      | 0.01 | 2.58(1.23-5.42)  | 0.01           |
| <b>Low risk (11~17) groups (n=755)</b>                    | 398        | 357           |      |                  |                |
| MI, ST, or Stroke                                         | 4 (1.0)    | 5 (1.4)       | 0.63 | 0.73(0.19-2.70)  | 0.63           |
| MI, ST, Stroke or TVR                                     | 17 (4.3)   | 11 (3.1)      | 0.36 | 1.42(0.66-3.03)  | 0.37           |
| Minor or Major bleeding                                   | 4 (1.0)    | 4 (1.1)       | 0.90 | 0.91(0.23-3.65)  | 0.90           |
| Cardiac death, MI, ST, stroke or Major bleeding           | 4 (1.0)    | 6 (1.7)       | 0.43 | 0.60 (0.17-2.14) | 0.44           |
| Cardiac death, MI, ST, stroke, Major bleeding or TVR      | 17 (4.3)   | 12 (3.4)      | 0.49 | 1.30 (0.62-2.72) | 0.49           |
| <b>Moderate risk (18~24) groups(n=409)</b>                | 215        | 194           |      |                  |                |
| MI, ST, or Stroke                                         | 3 (1.4)    | 4 (2.1)       | 0.61 | 0.68 (0.15-3.04) | 0.61           |
| MI, ST, Stroke or TVR                                     | 10 (4.7)   | 7 (3.6)       | 0.59 | 1.30(0.49-3.41)  | 0.60           |
| Minor or Major bleeding                                   | 0          | 2 (1.0)       | 0.14 | NA               |                |
| Cardiac death, MI, ST, stroke or Major bleeding           | 4 (1.9)    | 5 (2.6)       | 0.63 | 0.72 (0.19-2.69) | 0.72           |
| Cardiac death, MI, ST, stroke, Major bleeding or TVR      | 11 (5.1)   | 8 (4.1)       | 0.64 | 1.25(0.50-3.09)  | 0.64           |
| <b>High risk (<math>\geq 25</math>) groups (n=297)</b>    | 145        | 152           |      |                  |                |
| MI, ST, or Stroke                                         | 2 (1.4)    | 3 (2.0)       | 0.67 | 0.68(0.11-4.08)  | 0.67           |
| MI, ST, Stroke or TVR                                     | 3 (2.1)    | 6 (3.9)       | 0.32 | 0.50(0.13-2.00)  | 0.33           |
| Minor or Major bleeding                                   | 5 (3.4)    | 6 (4.0)       | 0.75 | 0.83 (0.25-2.71) | 0.75           |
| Cardiac death, MI, ST, stroke or Major bleeding           | 8 (5.5)    | 9 (5.9)       | 0.82 | 0.89(0.35-2.32)  | 0.82           |

|                                                      |         |          |      |                 |      |
|------------------------------------------------------|---------|----------|------|-----------------|------|
| Cardiac death, MI, ST, stroke, Major bleeding or TVR | 9 (6.2) | 12 (7.9) | 0.51 | 0.75(0.31-1.77) | 0.51 |
|------------------------------------------------------|---------|----------|------|-----------------|------|

---

Data are number (%). \* HRs are for short-duration DAPT vs. standard-duration DAPT groups. †P was calculated with Cox proportional hazard regression models.
